# Supplementary material for: Automated compound speciation, cluster analysis, and quantification of organic vapours and aerosols using comprehensive two-dimensional gas chromatography and mass spectrometry
Source: Copernicus journal article supplement (doi:10.5194/egusphere-2024-1671), 2024-06-18
Supplement: Supplementary file 1 [file egusphere-2024-1671-supplement.pdf]

1 **Supporting Information for:**

2

3 **Automated compound speciation, cluster analysis, and quantification of organic vapors and**  
4 **aerosols using comprehensive two-dimensional gas chromatography and mass spectrometry.**

5 Xiao He<sup>1</sup>, Xuan Zheng<sup>1\*</sup>, Shuwen Guo<sup>1</sup>, Lewei Zeng<sup>1</sup>, Ting Chen<sup>1</sup>, Bohan Yang<sup>1</sup>, Shupeixiao<sup>1</sup>,  
6 Qiongqiong Wang<sup>2</sup>, Zhiyuan Li<sup>3</sup>, Yan You<sup>4</sup>, Shaojun Zhang<sup>5,6,7,8</sup>, and Ye Wu<sup>5,6,7,8</sup>

7 <sup>1</sup>College of Chemistry and Environmental Engineering, Shenzhen University, Shenzhen 518060,  
8 China

9 <sup>2</sup>Department of Atmospheric Science, School of Environmental Studies, China University of  
10 Geosciences, Wuhan 430074, China

11 <sup>3</sup>School of Public Health (Shenzhen), Sun Yat-sen University, Guangzhou 510275, China

12 <sup>4</sup>National Observation and Research Station of Coastal Ecological Environments in Macao, Macao  
13 Environmental Research Institute, Macau University of Science and Technology, Macao SAR  
14 999078, China

15 <sup>5</sup>School of Environment, State Key Joint Laboratory of Environment Simulation and Pollution  
16 Control, Tsinghua University, Beijing 100084, China

17 <sup>6</sup>State Environmental Protection Key Laboratory of Sources and Control of Air Pollution Complex,  
18 Beijing 100084, China

19 <sup>7</sup>Beijing Laboratory of Environmental Frontier Technologies, School of Environment, Tsinghua  
20 University, Beijing 100084, China

21 <sup>8</sup>Laboratory of Transport Pollution Control and Monitoring Technology, Transport Planning and  
22 Research Institute, Ministry of Transport, Beijing 100028, China

23

24

25

26

27

28

29 **Summary of the Supporting Information:**

30 Pages: 14

31 Supplementary Table: 1

32 Supplementary Figures: 17

## 33 **S1. Indicative reaction schemes that are included in the model development**

34 Compounds containing hydrocarbon chains give rise to a series of ions distant from each other by  
35 14 Da (-CH<sub>2</sub>-) and the masses where they appear depend on the chemical structures linked to them.  
36 For example, aliphatic alkanes including *n*-*i*-alkanes, dissociate to the formula C<sub>n</sub>H<sub>2n+1</sub> regularly,  
37 with the most abundant ion fragments being mass-to-charge ratio (m/z) 43, 57, 71, and 85,  
38 corresponding to C<sub>3</sub>H<sub>7</sub>, C<sub>4</sub>H<sub>9</sub>, C<sub>5</sub>H<sub>11</sub>, and C<sub>6</sub>H<sub>13</sub>, respectively, and the M<sup>+</sup> being weakly observed  
39 (Lavanchy, Houriet and Gäumann 1979). Aliphatic alkenes exhibit the most abundant ion fragments  
40 at m/z 41, 55, 69, and 83. A short alkyl chain attached to the benzene ring yields an abundant peak  
41 at m/z 91, with the base peak (ion with the highest abundance relative to other ions in the mass  
42 spectrum) shifting to larger ions gradually as the alkyl chain extends. Saturated rings undergo the  
43 loss of one methyl group and yields an abundant [M - 15]<sup>+</sup> signal. The appearance of the m/z 60  
44 peak for carboxylic acids is a characteristic feature of the McLafferty rearrangement and provides  
45 valuable information about the identification of the compounds (Figure S3b). Aliphatic alcohols  
46 frequently cleave at the β bond to give a resonance-stabilized ion at m/z 31 (Figure S3c).  
47 Dissimilarly, aromatic alcohols generate a prominent M<sup>+</sup> ion, as the case for phenols. Esters consist  
48 of an alcohol and an acid component. When the acid portion is the major component, the  
49 fragmentation is partially characterized by typical acid peaks, where the loss of an alkyl radical  
50 through α-cleavage occurs predominantly, producing a discernable peak at m/z 74 (Figure S3f).  
51 Conversely, when the alcohol portion of the ester dominates, fragmentation similar to that of an  
52 alcohol is observed (Figure S3g). Trimethylsilyl derivatization is commonly used in GC analysis,  
53 and the fragments of m/z 73 and 147 are systematically observed in high abundance (He et al. 2018).  
54 Water elimination, indicated by an 18 Da loss, is common for hydroxyl groups (Harrison 2012). The  
55 McLafferty rearrangement dominates the mass spectrum via the transfer of a γ-hydrogen atom to a  
56 keto-group and the β-cleavage through a six-atom ring where appropriate (McLafferty 1959).  
57 Besides, the heteroatoms (e.g., oxygen) prevent the appearance of M<sup>+</sup>, whereas the conjugated  
58 aromatic rings intensify the M<sup>+</sup>. Aliphatic amines often undergo cleavage at the α-C-C bond to  
59 produce relatively stable ions: CH<sub>2</sub>NH<sub>2</sub><sup>+</sup> (m/z 30), C<sub>2</sub>H<sub>4</sub>NH<sub>2</sub><sup>+</sup> (m/z 44), and C<sub>3</sub>H<sub>6</sub>NH<sub>2</sub><sup>+</sup> (m/z 58) for  
60 amine groups attached to the primary carbon, secondary carbon, and tertiary carbon, respectively  
61 (Figure S4a) (Mikaia 2022). M<sup>+</sup> is frequently detected for amides, following the nitrogen rule. α-  
62 cleavage or McLafferty rearrangement produces dominant ions in the mass spectrum, as illustrated  
63 in Figure S4b. Neutral loss of HC≡N and McLafferty rearrangement produce abundant [M - 27]<sup>+</sup>  
64 and m/z 41 ions for nitriles. C-N and N-O bonds are weak for aliphatic nitro compounds, and M<sup>+</sup> is  
65 seldomly observed in the EI spectrum. Aromatic nitro compounds exhibit additional fragmentation  
66 patterns, including ring arrangement and ring-opening reactions. The dominant ions originate from  
67 the loss of NO<sup>+</sup> (m/z 30) or NO<sub>2</sub><sup>+</sup> (m/z 46).

## 68 **S2. The description of unresolved peaks**

69 The unidentified peaks accounted for 15%, 18%, and less than 1% for HDDV vapor, HDDV aerosol,  
70 and ambient aerosol samples, respectively. Those identified peaks could be divided into three sub-  
71 categories:

72 The first category is column bleedings that appear in the GC×GC plot regularly underneath alkane  
73 groups. The majority of column bleedings come up at the end of GC thermal program when the  
74 temperature is over 240 °C. These column bleedings were isolated and removed for further analysis  
75 at the very beginning of data treatment processes. Some other column bleedings with aliphatic  
76 siloxane skeleton appeared regularly from the beginning to the end of the GC×GC tests. The number  
77 of silicon atoms within the skeleton varied much, as a consequence of which their characteristic ions  
78 differed, and these bleeding peaks mixed with the chromatographic peaks. Their mass spectrum and  
79 example chemical structures are shown in Figure S5.

80 The second category is ester compounds scattering in the GC×GC plot. We have observed some  
81 aliphatic ester peaks in the middle of the GC×GC plot, one example given in Figure S6. Their mass  
82 spectra were compared to spectra from National Institute of Standards and Technology (NIST20)  
83 library and these peaks were identified with high match scores. There were only a few of these peaks,  
84 contributing to less than 1% of the total signal and they were not frequently detected in every sample.  
85 In this regard, the ester compounds were not included for further discussion and classified as  
86 unidentified.

87 The third category refers to the unresolved peaks literally. The mass spectra of these peaks were  
88 disorganized and did not follow distinct patterns. Some of the fragment ions stem from their own

89 peaks and others were interferences from the matrix. These peaks could not be classified into any  
 90 given groups in the model and were labeled unidentified.

91 Table 1. The list and linear correlation of the authentic standards.

| Group    | Name                  | 1 <sup>st</sup> RT (min) | 2 <sup>nd</sup> RT (s) | R <sup>2</sup> |
|----------|-----------------------|--------------------------|------------------------|----------------|
| Acid     | Isobutyric Acid       | 4.67                     | 1.25                   | 0.99           |
| Acid     | 2-Methyl butyric acid | 7.07                     | 1.36                   | 0.99           |
| Alcohol  | 1-Decanol             | 19.67                    | 1.42                   | 0.98           |
| Alcohol  | 1-Hexadecanol         | 34.14                    | 1.38                   | 0.96           |
| Alcohol  | n-Nonadecanol         | 39.94                    | 1.39                   | 0.95           |
| Alcohol  | 1-Docosanol           | 45.00                    | 1.43                   | 0.99           |
| Aldehyde | Octanal               | 11.60                    | 1.48                   | 1.00           |
| Aldehyde | Decanal               | 17.80                    | 1.46                   | 0.99           |
| Aldehyde | Pentanal              | 3.73                     | 1.17                   | 0.97           |
| Aldehyde | Hexanal               | 5.67                     | 1.41                   | 1.00           |
| Aldehyde | Decanal               | 17.80                    | 1.55                   | 0.99           |
| Alkane   | Heptane               | 3.74                     | 0.74                   | 0.97           |
| Alkane   | Octane                | 5.60                     | 0.87                   | 0.98           |
| Alkane   | Nonane                | 8.34                     | 0.94                   | 1.00           |
| Alkane   | Decane                | 11.47                    | 0.97                   | 1.00           |
| Alkane   | Undecane              | 14.67                    | 0.98                   | 0.99           |
| Alkane   | Dodecane              | 17.67                    | 0.97                   | 0.97           |
| Alkane   | Tridecane             | 20.47                    | 0.99                   | 0.97           |
| Alkane   | Tetradecane           | 23.20                    | 0.98                   | 0.99           |
| Alkane   | Pentadecane           | 25.67                    | 1.00                   | 0.99           |
| Alkane   | Hexadecane            | 28.07                    | 0.98                   | 0.99           |
| Alkane   | Heptadecane           | 30.34                    | 1.00                   | 0.97           |
| Alkane   | Octadecane            | 32.54                    | 1.04                   | 0.97           |
| Alkane   | Nonadecane            | 34.60                    | 1.03                   | 0.99           |
| Alkane   | Eicosane              | 36.54                    | 1.07                   | 0.96           |
| Alkane   | Heneicosane           | 38.40                    | 1.08                   | 0.96           |
| Alkane   | Docosane              | 40.20                    | 1.11                   | 0.98           |
| Alkane   | Tricosane             | 41.94                    | 1.12                   | 0.97           |
| Alkane   | Tetracosane           | 43.60                    | 1.12                   | 0.97           |
| Alkane   | Pentacosane           | 45.20                    | 1.17                   | 0.99           |
| Alkane   | Hexacosane            | 46.74                    | 1.22                   | 0.99           |
| Alkane   | Heptacosane           | 48.20                    | 1.20                   | 0.98           |
| Alkane   | Octacosane            | 49.60                    | 1.25                   | 0.98           |
| Alkane   | Nonacosane            | 51.00                    | 1.27                   | 0.97           |
| Alkane   | Triacontane           | 52.34                    | 1.33                   | 0.96           |
| Alkane   | Hentriacontane        | 53.60                    | 1.41                   | 0.97           |
| Alkane   | Dotriacontane         | 54.87                    | 1.53                   | 0.96           |
| Alkane   | Tritriacontane        | 56.14                    | 1.77                   | 0.96           |
| Alkane   | Tetratriacontane      | 57.60                    | 2.09                   | 0.96           |
| Alkane   | Pentatriacontane      | 59.27                    | 2.46                   | 0.99           |
| Alkene   | 1-Octene              | 5.39                     | 0.90                   | 0.99           |

|               |                        |       |      |      |
|---------------|------------------------|-------|------|------|
| Alkene        | 1-Octadecene           | 32.39 | 1.07 | 0.99 |
| Alkene        | 1-Docosene             | 40.13 | 1.13 | 0.99 |
| Alkene        | 1-Decene               | 11.19 | 0.99 | 0.98 |
| Alkene        | 1-Dodecene             | 17.39 | 1.03 | 0.96 |
| Alkene        | 1-Tetradecene          | 22.99 | 1.02 | 0.98 |
| Alkyl-benzene | Ethylbenzene           | 7.27  | 1.46 | 1.00 |
| Alkyl-benzene | p-Xylene               | 7.54  | 1.42 | 0.99 |
| Alkyl-benzene | o-Xylene               | 8.14  | 1.57 | 0.99 |
| Alkyl-benzene | Isopropylbenzene       | 9.07  | 1.51 | 1.00 |
| Alkyl-benzene | 1,3,5-Trimethylbenzene | 10.54 | 1.55 | 0.99 |
| Alkyl-benzene | Butyl-benzene          | 13.27 | 1.55 | 0.99 |
| Alkyl-benzene | Pentyl-benzene         | 16.40 | 1.54 | 0.97 |
| Alkyl-benzene | Hexyl-benzene          | 19.40 | 1.50 | 0.97 |
| Alkyl-benzene | 4-Ethyltoluene         | 10.40 | 1.61 | 0.98 |
| Alkyl-benzene | p-Cymene               | 12.33 | 1.61 | 0.97 |
| Alkyl-PAHs    | 1-Methylnaphthalene    | 20.87 | 2.44 | 1.00 |
| Alkyl-PAHs    | 1-Ethyl-naphthalene    | 23.14 | 2.41 | 0.97 |
| Amide         | Acetamide              | 5.07  | 2.51 | 1.00 |
| Amide         | Propanamide            | 7.00  | 2.79 | 0.96 |
| Amide         | N,N-Dibutylformamide   | 20.54 | 1.95 | 0.95 |
| Amine         | Triethylamine          | 3.60  | 0.86 | 0.99 |
| Amine         | Dibutylamine           | 10.27 | 1.18 | 0.99 |
| Amine         | Aniline                | 10.74 | 2.58 | 0.98 |
| Amine         | 1,2-Benzenediamine     | 17.80 | 3.50 | 1.00 |
| Amine         | 1-Naphthalenamine      | 26.60 | 3.57 | 0.96 |
| Amine         | 4-Biphenylamine        | 31.54 | 3.56 | 0.99 |
| Cycloalkane   | Ethyl-cyclohexane      | 6.59  | 0.99 | 0.95 |
| Cycloalkane   | Butyl-cyclohexane      | 12.59 | 1.12 | 0.99 |
| Cycloalkane   | Hexyl-cyclohexane      | 18.86 | 1.16 | 0.97 |
| Cycloalkane   | Octyl-cyclohexane      | 24.46 | 1.13 | 0.95 |
| Cycloalkane   | Decyl-cyclohexane      | 29.46 | 1.15 | 0.95 |
| Cycloalkane   | Dodecyl-cyclohexane    | 33.93 | 1.21 | 0.97 |
| Cycloalkane   | Tetradecyl-cyclohexane | 37.99 | 1.24 | 0.97 |
| Cycloalkane   | Hexadecyl-cyclohexane  | 41.66 | 1.29 | 0.98 |
| Ester         | Butyl acetate          | 5.93  | 1.39 | 0.98 |
| Ester         | Amyl Acetate           | 8.73  | 1.51 | 0.97 |
| Ester         | Isoamyl Acetate        | 7.66  | 1.39 | 0.99 |
| Furan         | Furan                  | 12.46 | 1.40 | 0.96 |
| Ketone        | 2-Nonanone             | 14.34 | 1.50 | 0.98 |
| Ketone        | 2-Dodecanone           | 23.00 | 1.43 | 0.97 |
| Ketone        | 2-Pentadecanone        | 30.34 | 1.38 | 0.99 |
| Ketone        | 2-Pentanone            | 3.53  | 1.09 | 0.99 |
| Ketone        | 3-Heptanone            | 7.93  | 1.49 | 0.99 |
| Oxy-PAH       | 1,4-Naphthalenedione   | 23.60 | 3.36 | 0.99 |

|            |                              |       |      |      |
|------------|------------------------------|-------|------|------|
| Oxy-PAH    | 9,10-Anthracenedione         | 36.07 | 3.85 | 0.99 |
| Oxy-PAH    | Benz(a)anthracene-7,12-dione | 46.74 | 4.62 | 0.98 |
| PAHs       | Indene                       | 12.94 | 2.12 | 0.99 |
| PAHs       | Naphthalene                  | 17.26 | 2.95 | 1.00 |
| PAHs       | Acenaphthylene               | 24.53 | 3.38 | 1.00 |
| PAHs       | Acenaphthene                 | 25.39 | 3.27 | 0.99 |
| PAHs       | Fluorene                     | 27.79 | 3.30 | 1.00 |
| PAHs       | Phenanthrene                 | 32.26 | 3.73 | 0.99 |
| PAHs       | Anthracene                   | 32.53 | 3.70 | 0.99 |
| PAHs       | Fluoranthene                 | 37.00 | 3.04 | 0.99 |
| PAHs       | Pyrene                       | 38.86 | 4.38 | 0.99 |
| PAHs       | Benz[a]anthracene            | 44.59 | 4.58 | 0.97 |
| PAHs       | Chrysene                     | 44.73 | 4.76 | 0.97 |
| PAHs       | Benzo[b]fluoranthene         | 49.26 | 5.15 | 0.96 |
| PAHs       | Benzo[k]fluoranthene         | 49.39 | 5.15 | 0.98 |
| PAHs       | Benzo[a]pyrene               | 50.53 | 5.61 | 0.97 |
| PAHs       | Indeno[1,2,3-cd]fluoranthene | 55.46 | 3.02 | 0.99 |
| Pinene     | $\alpha$ -Pinene             | 9.46  | 1.19 | 0.95 |
| Pinene     | $\beta$ -Pinene              | 10.86 | 1.35 | 0.99 |
| Polyphenyl | Biphenyl                     | 22.74 | 2.44 | 0.95 |

92

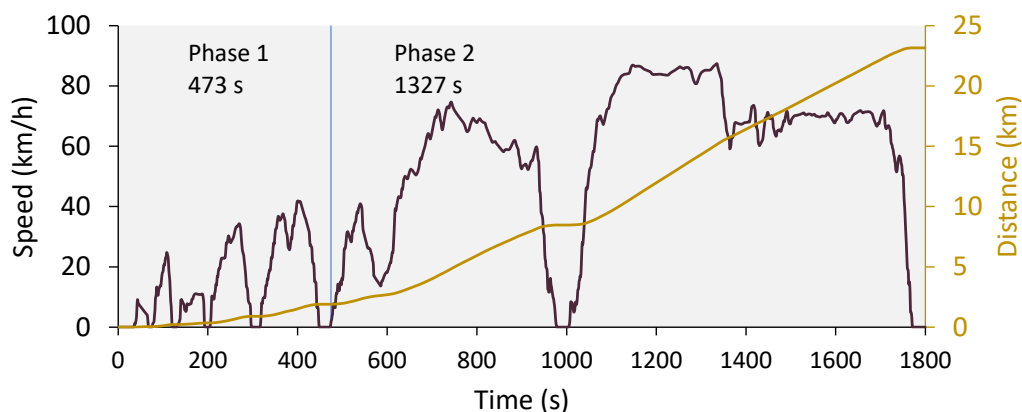

93  
 94 Figure S1. Speed trace for China heavy-duty commercial vehicle test cycle for tractor trailers  
 95 (CHTC-HT) cycle. The total duration is 1800 s and divided into two phases of 344 s and 1330 s.  
 96 The average speed is 46.5 km/h, and the idle ratio is 8.6%.  
 97

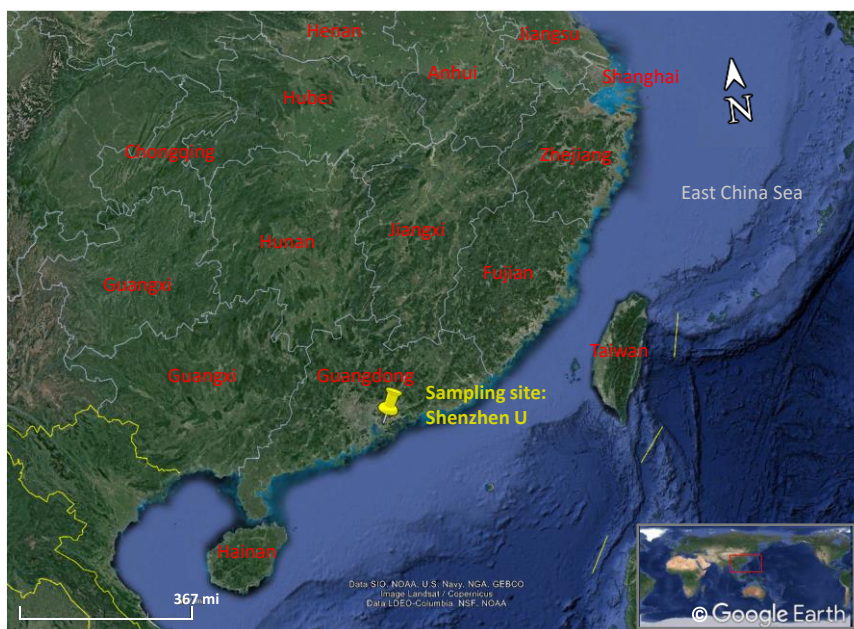

98  
 99 Figure S2. Sampling site location on Shenzhen University campus. PM<sub>2.5</sub> high-volume sampler was  
 100 installed on the rooftop of a 5-story building surrounded by university campus, residential areas,  
 101 greenbelts, and a golf park.

(a) Radical initiated  $\alpha$ -cleavage

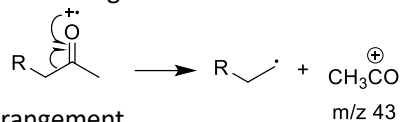

(b) McLafferty rearrangement

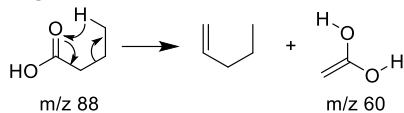

(c) Loss of  $\text{CH}_2\text{OH}$

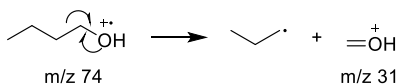

(d) Loss of  $\text{H}_2\text{O}$

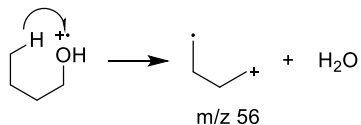

(e)  $\beta$ -cleavage

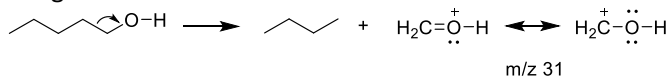

(f) Ester with acid portion dominant

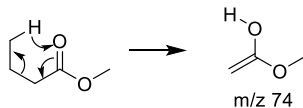

(g) Ester with alcohol portion dominant

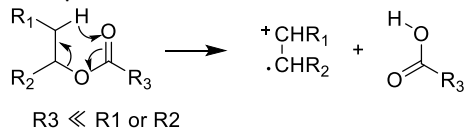

102

103

104

105

Figure S3. Interpretation of characteristic ions in the EI spectrum for O-containing species, including (a) aliphatic ketones, (b-d) aliphatic alcohols, (e) carboxylic acids, (f) esters with acid portion dominant, and (g) esters with alcohol portion dominant.

(a) Radical initiated  $\alpha$ -cleavage

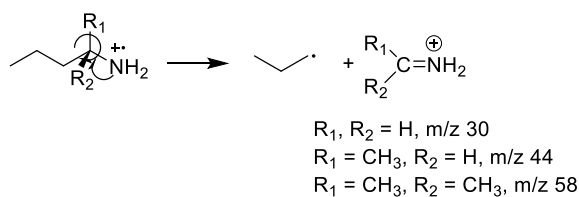

(b) McLafferty rearrangement

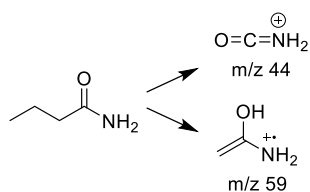

(c) Loss of HCN

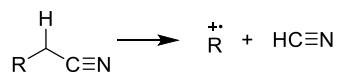

(d) McLafferty rearrangement

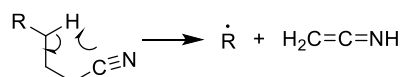

(e) Loss of  $\text{NO}_2$

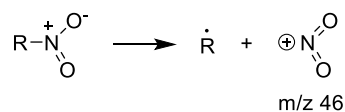

(f) Loss of NO

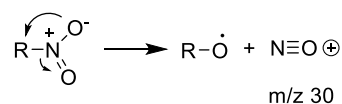

106  
107  
108  
109

Figure S4. Interpretation of the characteristic ions in the EI spectrum for N-containing species, including (a) aliphatic amines, (b) amides, (c) and (d) nitriles, and (e) organic nitrates, and (e) organic nitrites.



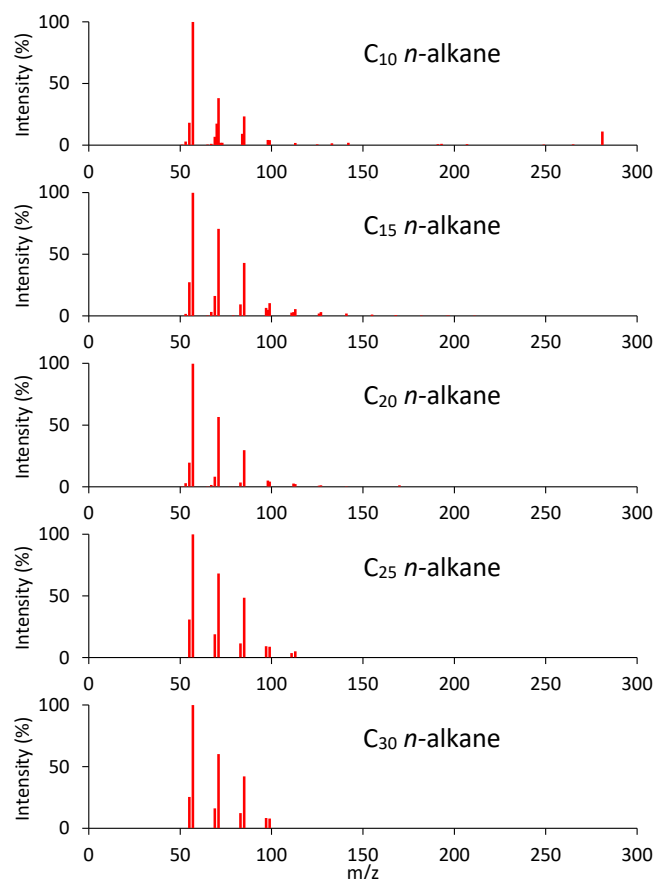

110  
111  
112  
113  
114

Figure S5. The mass spectra of homologous *n*-alkane standards from C<sub>10</sub> to C<sub>30</sub>, which exhibit high similarity. In such cases, the similarity score could be elevated incorrectly and mislead compound identification results.

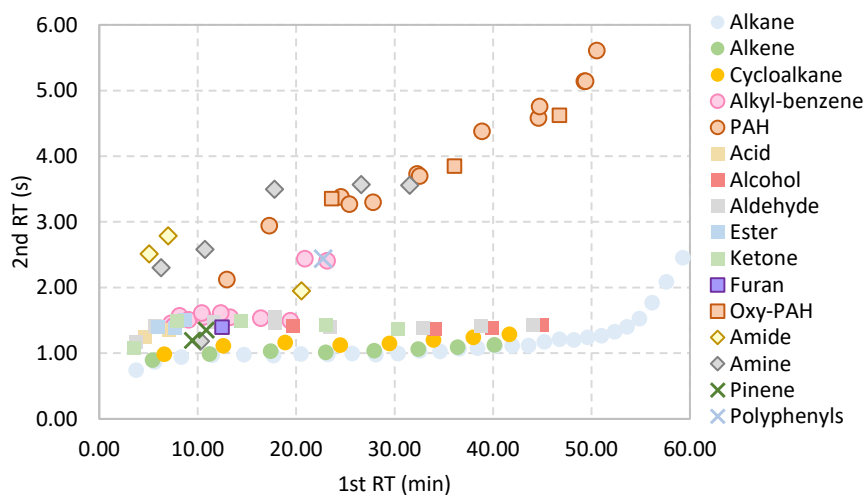

115  
116

Figure S6. The distribution of all authentic standards, coded by colors and shapes.

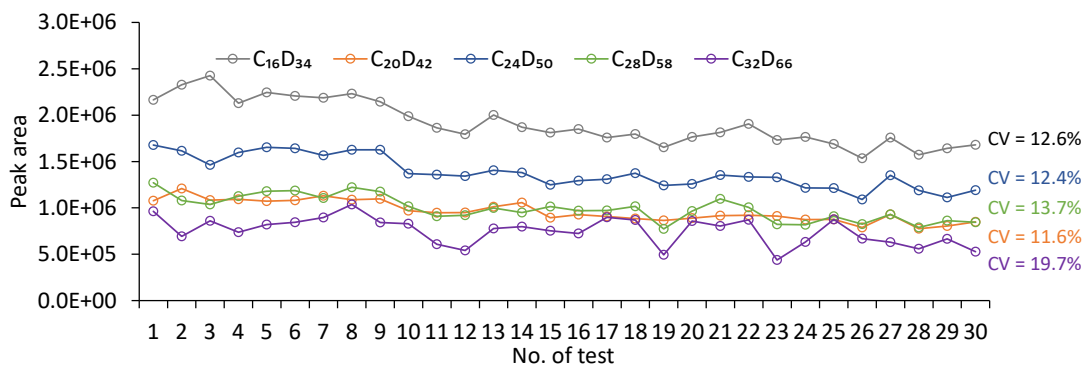

117  
118  
119  
120

Figure S7. The variation of peak areas of internal standards tested throughout the whole measurement.

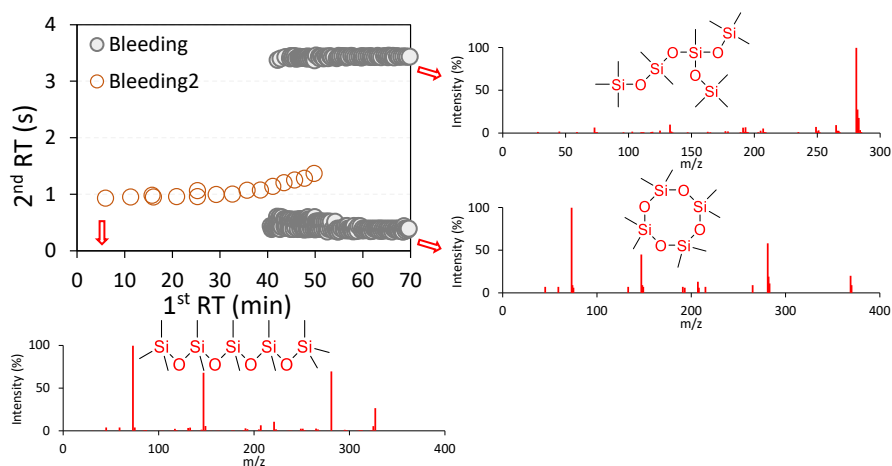

121  
122  
123

Figure S8. The distribution of the column bleedings in an example GCxGC plot and their respective mass spectra and chemical structures.

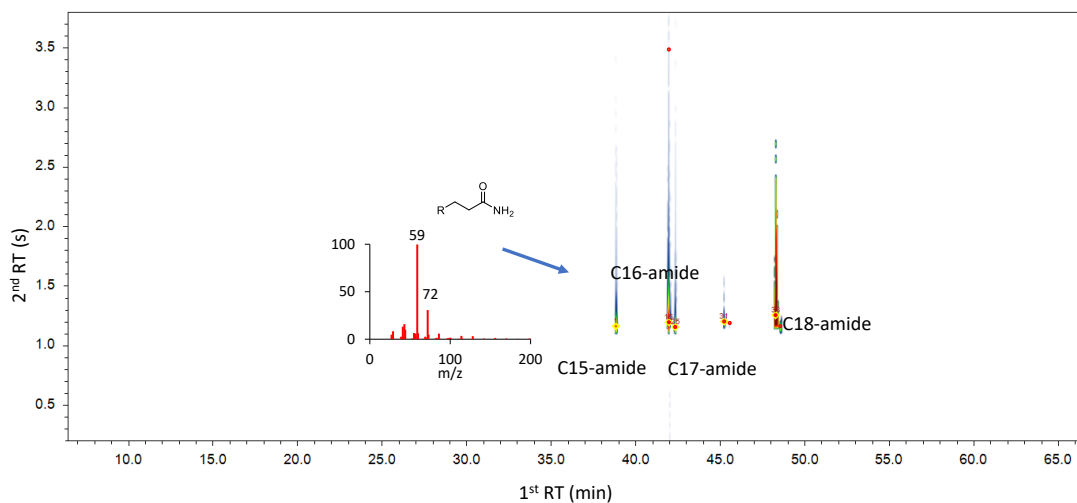

124  
125  
126

Figure S9. The chromatogram and mass spectra of tentatively identified amide representatives.

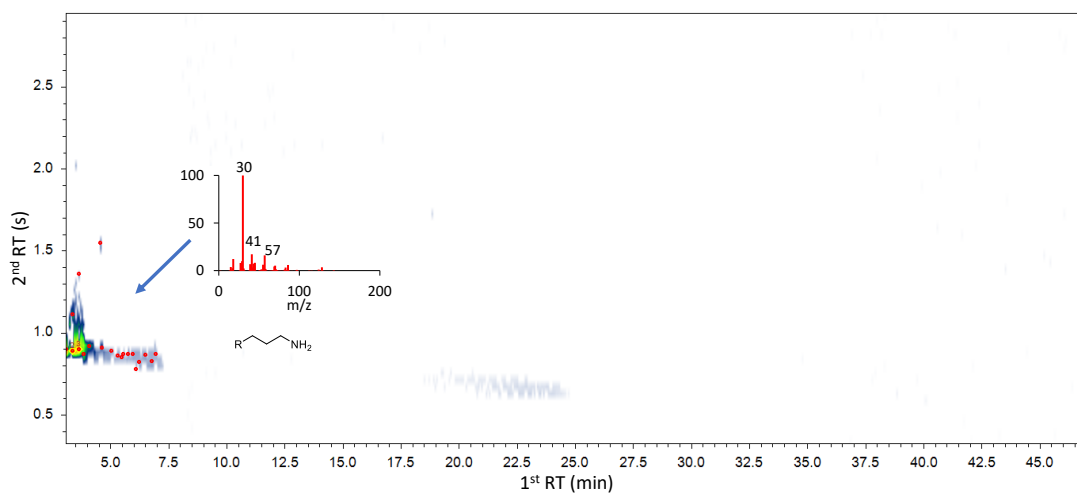

127  
128  
129

Figure S10. The chromatogram and mass spectra of tentatively identified amine representatives.

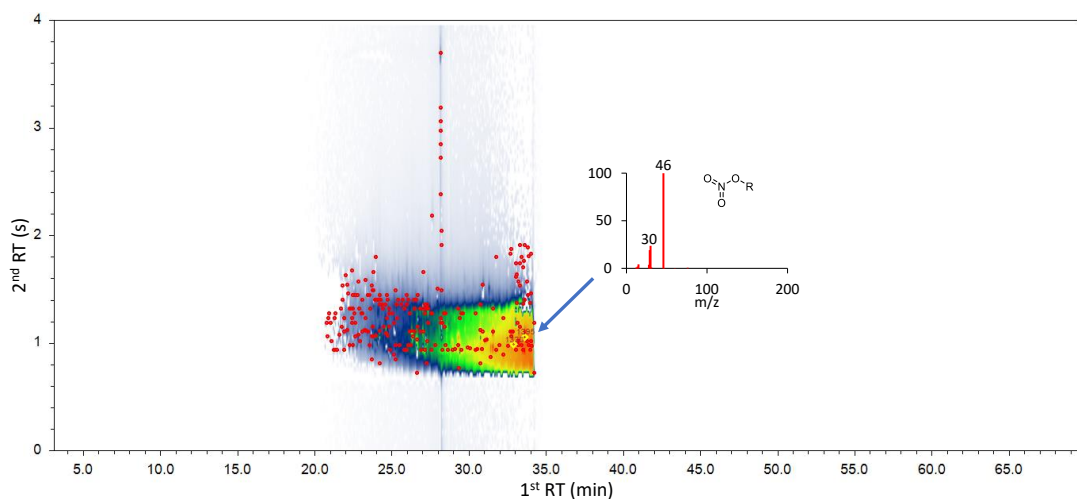

130  
131

Figure S11. The chromatogram and mass spectra of tentatively identified nitro representatives.

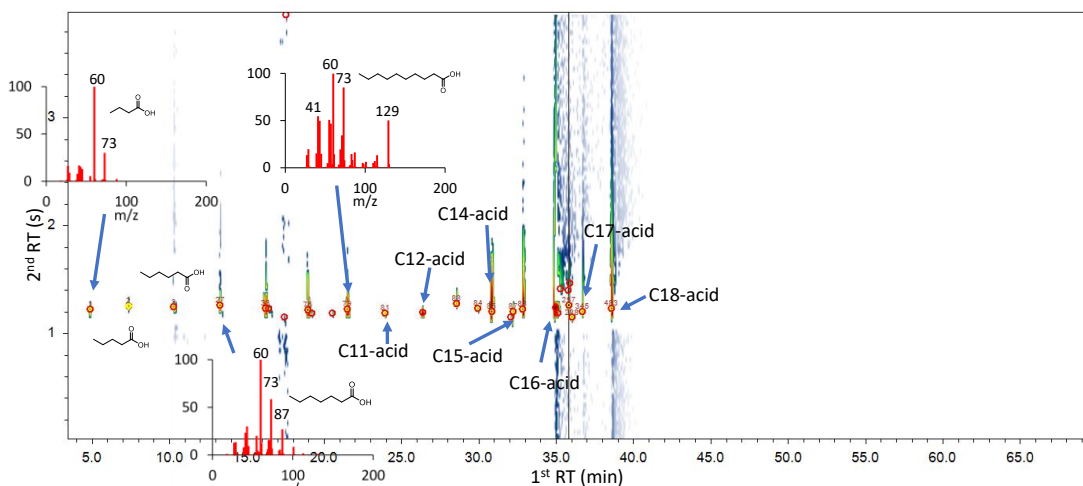

132  
133  
134  
135

Figure S12. The chromatogram and mass spectra of tentatively identified aliphatic acid representatives.

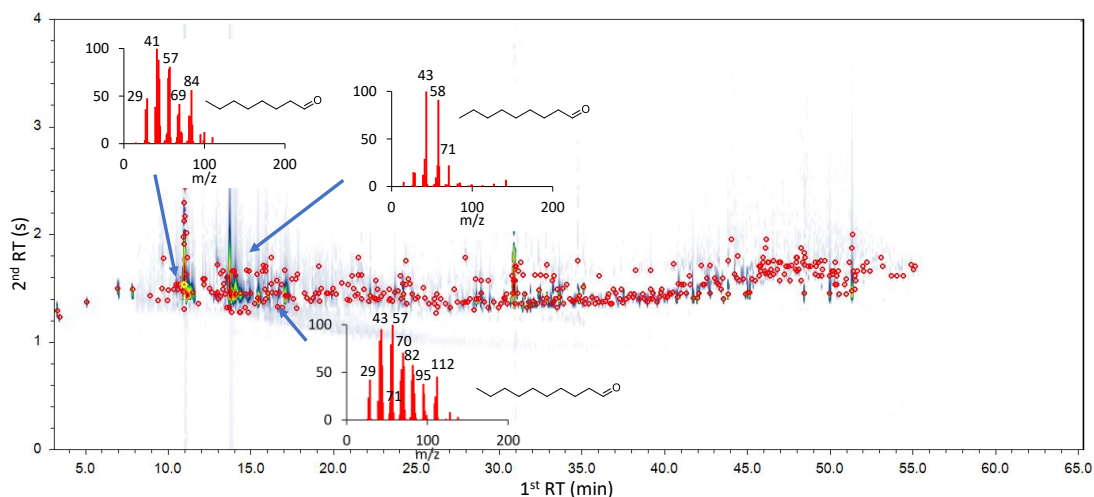

136  
137  
138  
139

Figure S13. The chromatogram and mass spectra of tentatively identified aliphatic aldehyde and ketone representatives.

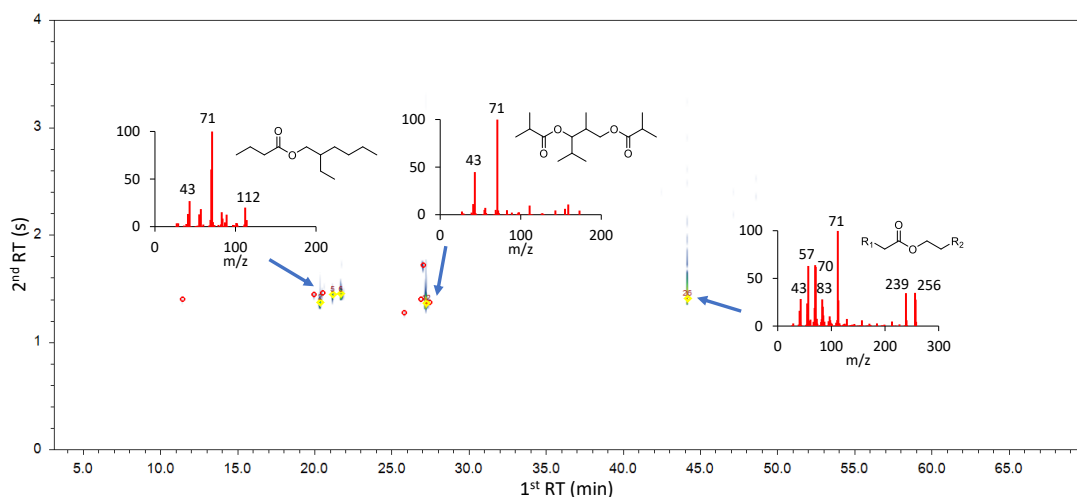

140  
141  
142

Figure S14. The chromatogram and mass spectra of tentatively identified aliphatic ester representatives.

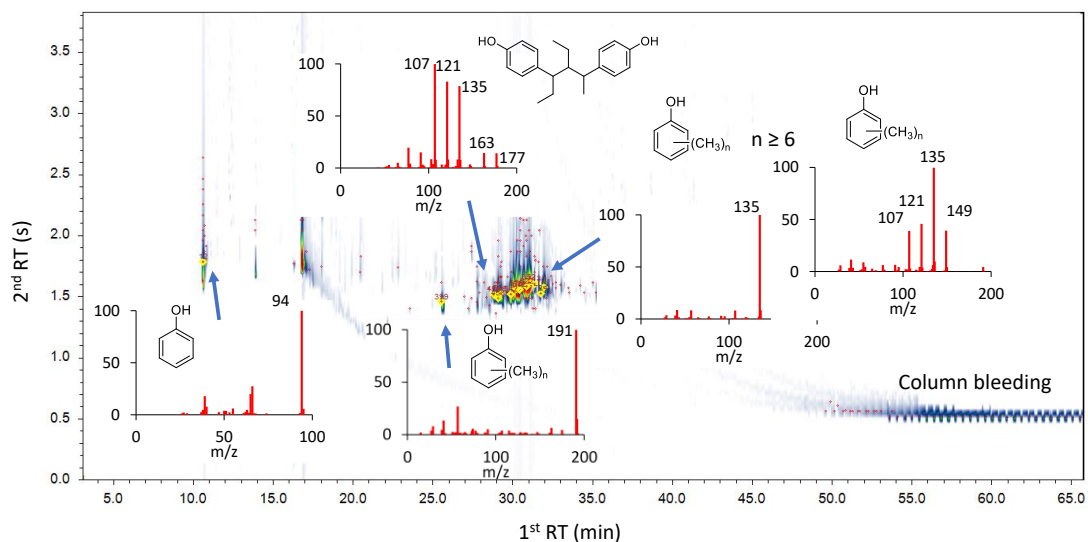

143  
 144 Figure S15. The chromatogram and mass spectra of tentatively identified phenol and alkyl-  
 145 substituted phenol representatives in HDDV vapor samples.  
 146

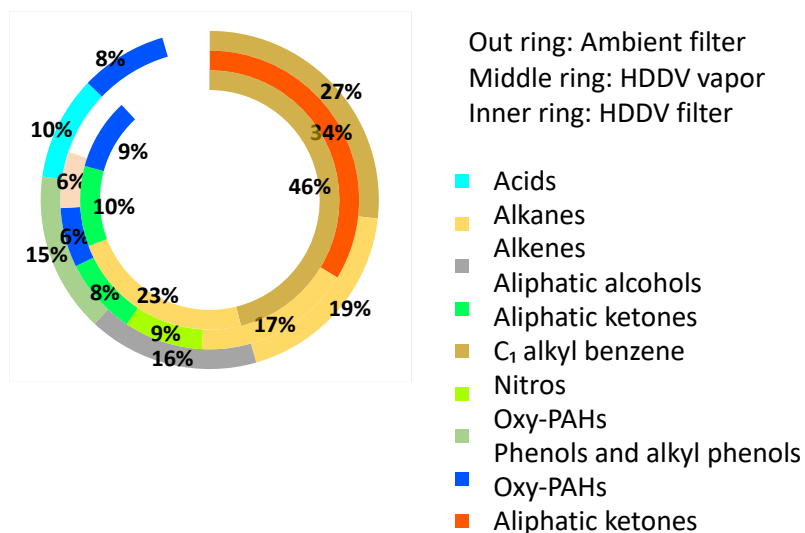

147  
 148 Figure S16. The top few species (contribution fraction exceeding 5%) distributions in different  
 149 samples: the out ring refers to the ambient aerosol sample, the middle ring refers to the HDDV  
 150 tailpipe vapor emission, and the inner ring refers to the HDDV tailpipe aerosol emission.

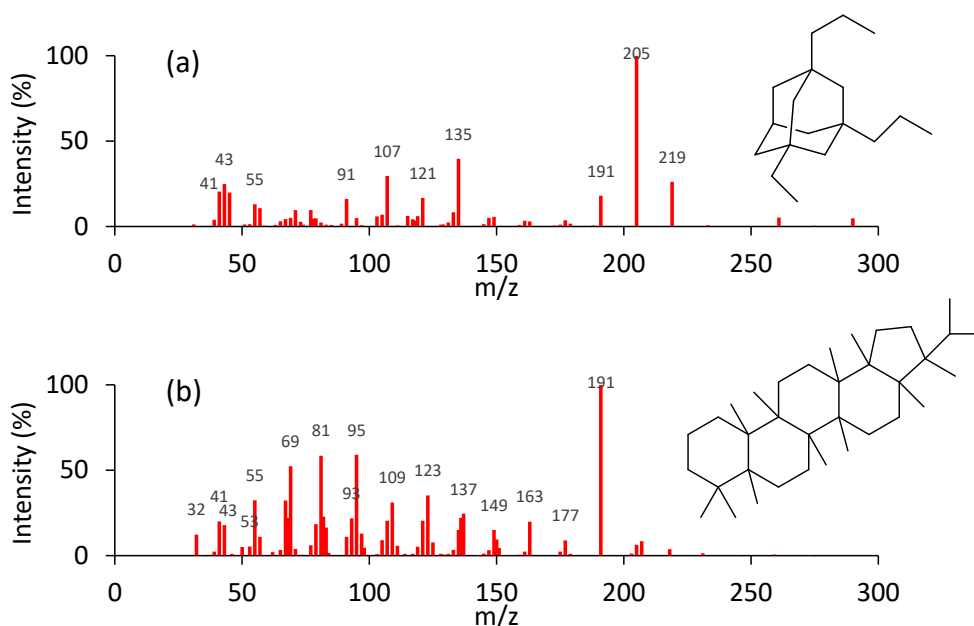

151  
 152 Figure S17. The chemical structures and mass spectra of (a) 1.1-Ethyl-3,5-dipropyladamantane  
 153 adamantane and (b) 17 $\alpha$ (H),21 $\beta$ (H)-hopane.  
 154

155 **References:**

- 156 Harrison, A. G. Pathways for water loss from doubly protonated peptides containing serine or threonine.  
 157 *J Am Soc Mass Spectrom*, 23, 116-123, <https://www.ncbi.nlm.nih.gov/pubmed/22065406>, 2012.  
 158 He, X., X. H. H. Huang, K. S. Chow, Q. Wang, T. Zhang, D. Wu & J. Z. Yu Abundance and Sources of  
 159 Phthalic Acids, Benzene-Tricarboxylic Acids, and Phenolic Acids in PM2.5 at Urban and Suburban Sites  
 160 in Southern China. *ACS Earth and Space Chemistry*, 2, 147-158, 2018.  
 161 Lavanchy, A., R. Houriet & T. Gäumann The mass spectrometric fragmentation of n-alkanes. *Organic*  
 162 *Mass Spectrometry*, 14, 79-85, <https://doi.org/10.1002/oms.1210140205>, 1979.  
 163 McLafferty, F. W. Mass Spectrometric Analysis. Molecular Rearrangements. *Anal Chem*, 31, 82-87,  
 164 <https://dx.doi.org/10.1021/ac60145a015>, 1959.  
 165 Mikaia, A. Protocol for Structure Determination of Unknowns by EI Mass Spectrometry. I. Diagnostic  
 166 Ions for Acyclic Compounds with up to One Functional Group. *Journal of Physical and Chemical*  
 167 *Reference Data*, 51, 031501, 2022.
