# Supplementary material for: Automated compound speciation, cluster analysis, and quantification of organic vapours and aerosols using comprehensive two-dimensional gas chromatography and mass spectrometry
Source: Copernicus journal article supplement (doi:10.5194/egusphere-2024-1671), 2024-06-18
Supplement: Supplementary file [file egusphere-2024-1671-AC2-supplement.pdf]

Point-to-point responses to review comments (egusphere-2024-1671)

Title: Automated compound speciation, cluster analysis, and quantification of organic vapors and aerosols using comprehensive two-dimensional gas chromatography and mass spectrometry

Review of Xiao He et al.

The development of analytical techniques has put forward higher requirements for the identification and processing of complex organic species. Developing innovative data parsing methods important to understand intricate chemical mixtures. The study reported an innovative method for the semi-automated identification and quantification of complex organic mixtures using GC×GC-MS and applied this method to organic vapor and aerosol samples collected from tailpipe emissions of heavy-duty diesel vehicles and the ambient atmosphere. The study is novelty, providing an automated approach for chemical compound speciation and cluster analysis. The manuscript is well organized and written. I recommend it can be accepted after a minor revision

Thanks very much for the positive evaluation of this work. Our point-to-point responses to your comments are presented below. Our response texts are marked in blue in this document. The revised texts in the main manuscript and the supporting information are also marked in blue.

**Specific comments:**

Line 88: “Despite a low retention rate”. What is retention rate? Do the authors mean population rate in the whole vehicle fleet?

Response:

Yes. Retention rate is a statistical measurement of the number of people or products that remain involved in some kind of entity. In this context, the retention rate of HDDV refers to the proportion of HDDVs in possession among the total number of vehicles.

Line 105: Section “2.1 Sample collection, treatment, and instrumental analysis”. Detailed sample information was not available in this section. For example, sampling season and the relevant PM<sub>2.5</sub> concentration in the atmosphere were unclear. How many diesel vehicles were measured, and their emission levels, engine size, repetition frequency, etc.?

Response:

Thanks for the suggestion. For the collection of HDDV tailpipe emissions, two HDDVs equipped with the selective catalytic reduction (SCR) system were recruited. The two HDDVs met the China IV national emission standard and were manufactured in 2021. More information is summarized in Table 1. In total, we collected 55 TA tube samples (11 of which were field blank samples) and 20 HDDV aerosol samples (3 of which were field blank samples). 6 ambient aerosol samples (including one blank sample) were collected during November 2023 and the relevant PM concentrations are listed in Table 2.

Table 1. Information of the two test HDDVs.

| Vehicle ID | Emission standard | Aftertreatment                | Model year | Gross vehicle weight (kg) | Vehicle type         | Mileage ( $\times 10^3$ km) | Engine model |
|------------|-------------------|-------------------------------|------------|---------------------------|----------------------|-----------------------------|--------------|
| #1         | China V           | Selective catalytic reduction | 2021       | 25000                     | Semi-trailer tractor | 22.2                        | dCi450-51    |
| #2         | China V           | Selective catalytic reduction | 2021       | 25000                     | Semi-trailer tractor | 34.8                        | MC13.54-50   |

Table 2. List of ambient samples and the corresponding PM concentration.

| Sample ID | Collection date | PM <sub>2.5</sub> concentration ( $\mu\text{g}/\text{m}^3$ ) | PM <sub>10</sub> concentration ( $\mu\text{g}/\text{m}^3$ ) |
|-----------|-----------------|--------------------------------------------------------------|-------------------------------------------------------------|
| #1        | 1-Nov-2023      | 17                                                           | 38                                                          |
| #2        | 5-Nov-2023      | 14                                                           | 28                                                          |
| #3        | 10-Nov-2023     | 16                                                           | 35                                                          |
| #4        | 11-Nov-2023     | 13                                                           | 28                                                          |
| #5        | 17-Nov-2023     | 19                                                           | 66                                                          |
| Blank     | 17-Nov-2023     | 19                                                           | 66                                                          |

We add the following texts in the revised manuscript:

“...following the China heavy-duty commercial vehicle test cycle for tractor trailers (CHTC-TT) driving cycles. Two HDDVs equipped with the selective catalytic reduction (SCR) system were recruited. The two HDDVs met the China IV national emission standard and were manufactured in 2021. More information is summarized in Table S1. The average temperature...”

“...building on the campus of Shenzhen University (22.60°N, 114.00°E) during November 2023 in western Shenzhen...”

“...every day using a high-volume sampler (Th-1000c II, Wuhan Tianhong Environmental Protection Industry Co., Ltd). In total, 55 TA tube samples (including 11 field blank samples), 20 HDDV aerosol samples (including 3 field blank samples), and 6 ambient aerosol samples (including one blank sample) were collected. The list of ambient samples and the relevant PM concentrations are listed in Table S2. The sorbent tubes were well sealed and stored...”

We add the following texts in the revised supporting information:

“Table S1. Information of the two test HDDVs.

| Vehicle ID | Emission standard | Aftertreatment                | Model year | Gross vehicle weight (kg) | Vehicle type         | Mileage ( $\times 10^3$ km) | Engine model |
|------------|-------------------|-------------------------------|------------|---------------------------|----------------------|-----------------------------|--------------|
| #1         | China V           | Selective catalytic reduction | 2021       | 25000                     | Semi-trailer tractor | 22.2                        | dCi450-51    |

|    |         |                               |      |       |                      |      |            |
|----|---------|-------------------------------|------|-------|----------------------|------|------------|
| #2 | China V | Selective catalytic reduction | 2021 | 25000 | Semi-trailer tractor | 34.8 | MC13.54-50 |
|----|---------|-------------------------------|------|-------|----------------------|------|------------|

Table S2. List of ambient samples and the corresponding PM concentration.

| Sample ID | Collection date | PM <sub>2.5</sub> concentration (µg/m <sup>3</sup> ) | PM <sub>10</sub> concentration (µg/m <sup>3</sup> ) |
|-----------|-----------------|------------------------------------------------------|-----------------------------------------------------|
| #1        | 1-Nov-2023      | 17                                                   | 38                                                  |
| #2        | 5-Nov-2023      | 14                                                   | 28                                                  |
| #3        | 10-Nov-2023     | 16                                                   | 35                                                  |
| #4        | 11-Nov-2023     | 13                                                   | 28                                                  |
| #5        | 17-Nov-2023     | 19                                                   | 66                                                  |
| Blank     | 17-Nov-2023     | 19                                                   | 66                                                  |

”

Line 109-111: “The average temperature in the sampling train was precisely controlled at 47 °C, and airflow, relative humidity, and airflow, relative humidity, and pressure were monitored simultaneously”. “and airflow, relative humidity” were repeated.

Response:

Sorry for the typo errors. We revise them in the revised manuscript.

Line 163: Section “2.3 Algorithmic development”. I think the methodology how the authors train, iterate, and optimize the scripts was introduced somewhat roughly, which is important whether this algorithm can be referenced by other studies. For example, how many parameters does the algorithm contain and how many parameters can be optimized, what about their impacts. How many times did the authors conduct training, how effective was the training, and so on.

Response:

Thanks for this insightful comment. All data utilized to develop and test the scripts were processed by Canvas Browser (version 2.5, J&X Technologies) for basic preprocessing, such as baseline correction, mass spectra deconvolution, and peak smoothing. The software offers four built-in features: ABUND (X) returns the normalized abundance of the input ion mass; HASMASS (X) indicates whether the input ion exists; ORDER (X) specifies the order of the input ion mass; MASS (X) returns the mass of the input ion’s order. It also supports two logical operators, “And” and “Or”.

Basically, compounds containing hydrocarbon chains give rise to a series of ions separated by 14 Da (-CH<sub>2</sub>-), as shown in Figure 1. As a result, the top ions to identify alkanes would be m/z = 43, m/z = 57, m/z = 71, and m/z = 84. Due to the stability of chemical groups, generally, the abundance of m/z = 57 is highest, followed by m/z = 43 and m/z = 71. When incorporating these rules into the data treatment software, a few steps need to be taken, as shown in Figure 2. Cluster of alkanes can be extracted by the following rules:

((MASS(1)=43 && (MASS(2)=57 || MASS(2)=71 || MASS(2)=41)) || (MASS(1)=57 && (MASS(2)=43 || MASS(2)=71 || MASS(2)=41)))

where “&&” and “||” refers to the logical operators “And” and “Or”, respectively. Paste the rules in Ion Extractor Editor and the cluster of alkanes can be filtered.

For compounds with heteroatoms, the fragmentation can be complicated. Taking aliphatic amines as an example, they often undergo cleavage at the  $\alpha$ -C-C bond to produce relatively stable ions:  $\text{CH}_2\text{NH}_2^+$  ( $m/z$  30),  $\text{C}_2\text{H}_4\text{NH}_2^+$  ( $m/z$  44), and  $\text{C}_3\text{H}_6\text{NH}_2^+$  ( $m/z$  58) for amine groups attached to the primary, secondary, and tertiary carbons, respectively (Figure 3).<sup>1</sup> Then, cluster of aliphatic amines can be extracted by the following rules:

```
(MASS(1) = 30 && ABUND(MASS(2)) < 20) || (MASS(1) = 58 && ABUND(MASS(2)) < 40) ||
(MASS(1) = 58 && MASS(2) = 59) || (MASS(1) = 30 && (MASS(2) = 31 || MASS(2) =
28)) || ((ABUND(30) + ABUND(44)) > 100)
```

Similarly, a total of 26 compound clusters were constructed with high accuracy and repeatability.

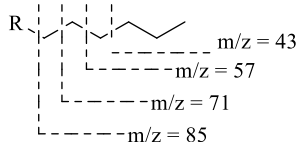

Figure 1. The common fragmentation patterns of n-alkanes.

Open Canvas → Open Browser → File → Load Data (load a sample) →  
Speciation → Find All Peaks → Mass Spectrum → Extraction Rules

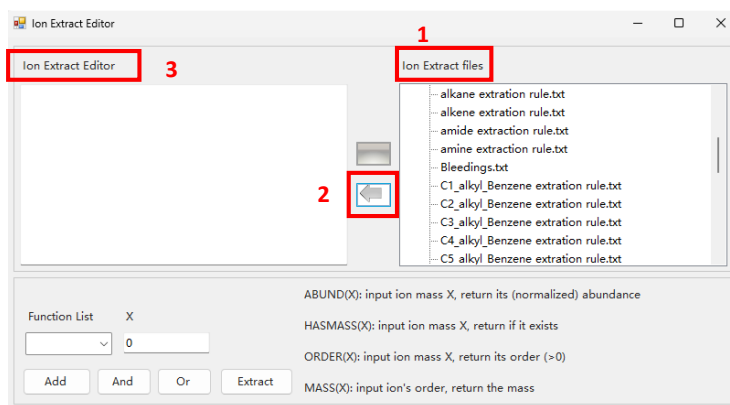

Figure 2. The steps to enable the ion extract function built in Canvas.

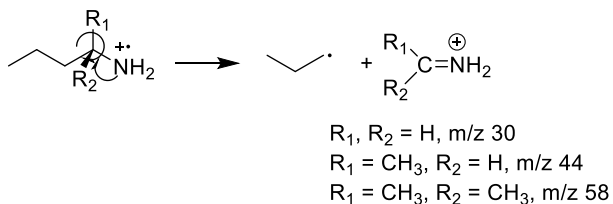

Figure 3. The  $\alpha$ -C-C bond cleavage of aliphatic amines produces  $\text{CH}_2\text{NH}_2^+$  ( $m/z$  30),  $\text{C}_2\text{H}_4\text{NH}_2^+$  ( $m/z$  44), and  $\text{C}_3\text{H}_6\text{NH}_2^+$  ( $m/z$  58) for amine groups attached to the primary, secondary, and tertiary carbons.

We added the following texts and figure in the revised supporting information:

“...When incorporating these rules into the data treatment software (Canvas, version 2.5, J&X Technologies), several steps are necessary, as depicted in Figure S5. The software offers four built-in features: ABUND (X) returns the normalized abundance of the input ion mass; HASMASS (X) indicates whether the input ion exists; ORDER (X) specifies the order of the input ion mass; MASS (X) returns the mass of the input ion’s order. Additionally, the function supports two logical operators, “And” and “Or”. Subsequently, cluster of alkanes can be extracted by the following rules:

```
((MASS(1)=43 && (MASS(2)=57 || MASS(2)=71 || MASS(2)=41)) || (MASS(1)=57 && (MASS(2)=43 || MASS(2)=71 || MASS(2)=41)))
```

where “&&” and “||” refers to the logical operators “And” and “Or”, respectively. Paste the rules in Ion Extractor Editor and the cluster of alkanes can be isolated.

Similar, the cluster of aliphatic amines can be extracted by the following rules:

```
(MASS(1) = 30 && ABUND(MASS(2)) < 20) || (MASS(1) = 58 && ABUND(MASS(2)) < 40) || (MASS(1) = 58 && MASS(2) = 59) || (MASS(1) = 30 && (MASS(2) = 31 || MASS(2) = 28)) || ((ABUND(30) + ABUND(44)) > 100)
```

In total, the extraction rules for 26 compound clusters are constructed with high accuracy and repeatability.

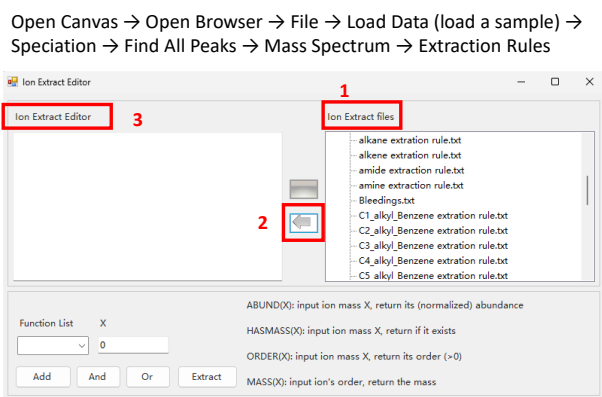

Figure S5. The steps to enable the ion extract function built in Canvas.”

To better describe the algorithm, we also add the following descriptive pseudo-codes in the revised manuscript:

“...The scripts began by recognition of the common mass spectra features of compound cluster of interest and are addressed in more details in the following descriptive framework:

...

```
For (i = 1 to m) # m equals the number of all tested samples.  
  Load the sample  
  Peak identification
```

```

Baseline correction
Mass spectra deconvolution
Peak smoothing
  For (j = 1 to 26) # In total, 26 compound clusters were constructed with high accuracy
and repeatability.
    Execute the Extraction rule of cluster (j)
    Export peak number, 1st RT and 2nd RT, peak area, peak height, peak width, and
deconvoluted
mass spectra
  Next j
Next i

```

Line 286: Section “3.2 Model uncertainty estimation”. The authors have conducted a detail uncertainty analysis on the model estimation. However, I still wonder the differences of the results analyzed by this new approach compared to the traditional one. It would be better if there could be some validation for some species by two different identification methods.

Response:

Thanks for the comments. Taking Octanal (Formula:  $C_8H_{16}O$ ) as an example, it elutes at (1<sup>st</sup> RT = 11.1908 min, 2<sup>nd</sup> RT = 1.295 s), and the nearest n-alkane reference compound is  $C_{10}H_{22}$  (1<sup>st</sup> RT = 11.1923 min, 2<sup>nd</sup> RT = 0.988 s). The chromatographic information of the two compounds is listed in Table 3. Dividing the whole chromatogram into bins based on the 1<sup>st</sup> RT, Octanal would be assigned to B10, where  $C_{10}$  n-alkane is the reference compound.<sup>2,3</sup> In this case, the concentration of Octanal would be overestimated by over 210%.

Table 3. The chromatographic information of Octanal and  $C_{10}H_{22}$ .

|                | 1 <sup>st</sup> RT<br>(min) | 2 <sup>nd</sup> RT<br>(s) | Slope | Group            |
|----------------|-----------------------------|---------------------------|-------|------------------|
| $C_{10}H_{22}$ | 11.1923                     | 0.988                     | 9.93  | Alkane           |
| $C_8H_{16}O$   | 11.1908                     | 1.295                     | 21.5  | Aliphatic ketone |

Line 417: Figure 5. How many samples for the heavy-duty diesel vehicle emissions and the ambient atmosphere and what about the consistency between the samples of the diesel vehicle and ambient samples, respectively?

Response:

In total, we collected 55 TA tube samples (11 of them were field blank samples), 20 HDDV aerosol samples (3 of them were field blank samples), and 6 ambient aerosol samples (one blank sample). We add the following texts in the revised manuscript:

“...Sampling strategy followed a regular schedule of one 24-h sample every day using a high-volume sampler (Th-1000c II, Wuhan Tianhong Environmental Protection Industry Co., Ltd). In total, 55 TA tube samples (including 11 field blank samples), 20 HDDV aerosol samples (including 3 field blank samples), and 6 ambient aerosol samples (including one blank sample)

were collected. TD samples were kept dry at room temperature, and quartz filters were stored frozen at  $-18\text{ }^{\circ}\text{C}$  before analysis. All sampling materials were pre-baked thoroughly to remove potential carbonaceous contamination.”

Since the HDDV samples and ambient samples were collected under different driving and atmospheric conditions, the sample-by-sample consistency was not compared. However, we traced the peak areas of representative deuterated internal standards, and the results were displayed in Figure S7 (Figure S8 in the revised supporting information document). The coefficients of variation (CVs) indicated the general variation of the ISs within the entire measurement.<sup>4</sup> Excellent stability was clearly observed, with all CV values being lower than 20%, which demonstrated the robustness of the testing system.

#### Reference:

- (1) Mikaia, A. Protocol for Structure Determination of Unknowns by EI Mass Spectrometry. I. Diagnostic Ions for Acyclic Compounds with up to One Functional Group. *Journal of Physical and Chemical Reference Data* **2022**, *51* (3), 031501. DOI: 10.1063/5.0091956.
- (2) Zhao, Y.; Hennigan, C. J.; May, A. A.; Tkacik, D. S.; de Gouw, J. A.; Gilman, J. B.; Kuster, W. C.; Borbon, A.; Robinson, A. L. Intermediate-volatility organic compounds: a large source of secondary organic aerosol. *Environ Sci Technol* **2014**, *48* (23), 13743-137550. DOI: 10.1021/es5035188.
- (3) Zhao, Y.; Nguyen, N. T.; Presto, A. A.; Hennigan, C. J.; May, A. A.; Robinson, A. L. Intermediate Volatility Organic Compound Emissions from On-Road Diesel Vehicles: Chemical Composition, Emission Factors, and Estimated Secondary Organic Aerosol Production. *Environ Sci Technol* **2015**, *49* (19), 11516-11526. DOI: 10.1021/acs.est.5b02841.
- (4) He, X.; Wang, Q.; Huang, X. H. H.; Huang, D. D.; Zhou, M.; Qiao, L.; Zhu, S.; Ma, Y.-g.; Wang, H.-l.; Li, L.; et al. Hourly measurements of organic molecular markers in urban Shanghai, China: Observation of enhanced formation of secondary organic aerosol during particulate matter episodic periods. *Atmospheric Environment* **2020**, *240*, 117807. DOI: 10.1016/j.atmosenv.2020.117807.
